# Supplementary material for: Di(2-Ethylhexyl) Phthalate Induces Osteoblast Cytotoxicity through Alterations in the Oxidant-Antioxidant System
Source: Preprints.org preprint supplement (doi:10.20944/preprints202401.0575.v1), 2024-01-08
Supplement: Supplementary file 1 [file supplementary]

Supplementary Materials: Di(2-ethylhexyl) phthalate induces osteoblast cytotoxicity through alterations in the oxidant-antioxidant system

Gautham Chengizkhan1, Manju Mohan1, Shabana Thabassum Mohammed Rafi1, Sridhar Muthusami2, Satish
Ramalingam3, Lurdes Queimado4, R. Ileng Kumaran5, Srinivasan Narasimhan1 and Ilangovan Ramachandran1*

**Table S1.** Forward and Reverse primer sequences.

| GAPDH | Forward : 5’- GTCTCCTCTGACTTCAACAGCG3’  Reverse : 5’ ACCACCCTGTTGCTGTAGCCAA3’ |
| --- | --- |
| AR | Forward : 5’ ATGGTGAGCAGAGTGCCCTATC3’  Reverse : 5’ ATGGTCCCTGGCAGTCTCCAAA3’ |
| ERα | Forward : 5’ CCACTATGGTGTGGCATCCTGT3’  Reverse : 5’ GGTGATCTCACACTCGTTGGAG3’ |
| ERβ | Forward : 5’ ATGGAGTCTGGTCGTGTGAAGG3’  Reverse : 5’ TAACACTTCCGAAGTCGGCAGG3’ |
| ALP | Forward : 5’GCTGTAAGGACATCGCCTACCA3’  Reverse : 5’ CCTGGCTTTCTCGTCACTCTCA3’ |
| RANKL | Forward : 5’ GCCTTTCAAGGAGCTGTGCAAAAT3’  Reverse : 5’ GAGCAAAAGGCTGAGCTTCAAGC3’ |
